# Supplementary material for: Magnetic and Geochemical Properties of Zagreb City Area Soils
Source: Preprints.org preprint supplement (doi:10.20944/preprints202309.0107.v1), 2023-09-04
Supplement: Supplementary file 1 [file supplementary]

**Table 1A.** Samples from Zagreb area (*ICP-OES analysis conducted on marked samples).

| **Sample code** | **Sample name** | **Geographical coordinates** | **MS in situ/laboratory measurements (10-3 SI Units )** |
| --- | --- | --- | --- |
| 1 | Domovinski Most Žitnjak | 45.7740439918759,16.0646237216045 | 0.134 |
| 2 | Domovinski Most - Desna Obala | 45.7674046988826,16.0745809092195 | 0.153 |
| 3 | Sajmišna cesta - istočno od željezničkog mosta | 45.756796267067,16.0492017620444 | 0.172 |
| 4 | Jakuševec - uz ogradu | 45.7617897301369,16.0362761114126 | 0.132 |
| 5 | Jakuševec - uz ogradu preko nasipa | 45.7622696325107,16.0363446304065 | 0.262 |
| 6 | Jakuševec - zapadna strana | 45.7714542709519,16.0200244441544 | 0.135 |
| 7 | Jakuševec - zapadna strana preko nasipa | 45.7718331798484,16.0206753280813 | 0.403 |
| 8 | Most Mladosti južna strana | 45.7821987831065,16.0037965441551 | 0.124 |
| 9 | Bundek - istok * | 45.7830193018431,15.9962064322574 | 0.610/0.171 |
| 10 | Bundek - sredina | 45.7838999603551,15.9930464354659 | 0.649 |
| 11 | Bundek - zapad | 45.7864101071037,15.9841058651128 | 0.170 |
| 12 | Dugave - kod Mamutice | 45.7704076311764,15.9923265221306 | 0.145 |
| 13 | Mala Mlaka - uz vodocrpilište (1) * | 45.7462743121562,15.9747169833504 | 0.265/0.208 |
| 14 | Mala Mlaka - uz vodocrpilište (2) | 45.7458158117247,15.9741739778074 | 0.275 |
| 15 | Bauhaus Buzin * | 45.7535884190359,15.9945891742625 | 0.143/0.094 |
| 16 | Radmanovačka ulica | 45.7700832241245,15.9800396998299 | 0.159 |
| 17 | Park Mladenaca | 45.7746465500553,15.9673445410879 | 0.245 |
| 18 | Park Mladenaca - igralište | 45.7751032381159,15.9671763910422 | 0.130 |
| 19 | Jadranski most - jug | 45.7816941593734,15.95385283141 | 0.250 |
| 20 | Park kod bolnice Blato | 45.7702962415937,15.9319913022756 | 0.154 |
| 21 | Lučko - ispod mosta | 45.7602249116831,15.8976352840539 | 0.393 |
| 22 | Jankomirski most | 45.7935806269139,15.8557617081342 | 0.111 |
| 23 | Podsused most - lijeva obala | 45.8147444165568,15.832490854702 | 0.298 |
| 24 | Dom zdravlja Špansko | 45.8026157149214,15.8956596797069 | 0.154 |
| 25 | Studentski dom SR | 45.7836971448718,15.949668145084 | 0.487 |
| 26 | Studentski dom SR - preko nasipa | 45.7831088570426,15.9501293702797 | 0.557 |
| 27 | Prisavlje - između Kockice i nebodera | 45.7898336898784,15.9668565159461 | 0.363 |
| 28 | Prisavlje - uz Savu (1) * | 45.7887563568321,15.9664180126452 | 1.920/1.133 |
| 29 | Prisavlje - uz Savu (2) | 45.788273653519,15.9650386659405 | 1.320 |
| 30 | Prisavlje (3) | 45.78947905595,15.965193478511 | 0.522 |
| 31 | Klub Jedrenja (1) | 45.7850940879971,15.9109551956364 | 0.128 |
| 32 | Klub Jedrenja (2) | 45.7853682681368,15.9099933080156 | 0.122 |
| 33 | Bejzbol Klub Jarun Uz Savu (1) | 45.7786274233417,15.9071087533958 | 0.184 |
| 34 | Bejzbol Klub Jarun Uz Savu (2) | 45.7787906539309,15.9072969096575 | 0.165 |
| 35 | Bejzbol Klub Jarun Uz Savu (3) * | 45.7801066807969,15.9101155889901 | 0.135/0.099 |
| 36 | Beach Bar Jarun | 45.7809718414207,15.9113074612978 | 0.154 |
| 37 | Kanu Klub Končar | 45.7784918701123,15.9236021302682 | 0.113 |
| 38 | Kanu Klub Končar (2) livada | 45.7785522055982,15.9224291015104 | 0.191 |
| 39 | Sava uz Malo jezero (1) | 45.7750205542008,15.9377868606528 | 0.166 |
| 40 | Sava uz Malo jezero (2) | 45.7752701022045,15.9373544410025 | 0.124 |
| 41 | Sava uz Malo jezero (3) | 45.7762136901334,15.9370593778734 | 0.173 |
| 42 | Aquarius klub | 45.7775885288217,15.9371615960587 | 0.188 |
| 43 | Potok Črnomerec (1) | 45.7818410885191,15.9395530439582 | 0.216 |
| 44 | Potok Črnomerec (2) | 45.781652000251,15.9393982757416 | 0.345 |
| 45 | Šuma uz potok Črnomerec | 45.7815276611746,15.9401798570782 | 0.248 |
| 46 | Beach Champ Jarun | 45.7810855242149,15.9334304834393 | 0.185 |
| 47 | IRB | 45.8295539829427,15.9885922853691 | 0.236 |
| 48 | Trnjanski nasip (1) | 45.7907795593901,15.989418541487 | 0.269 |
| 49 | Trnjanski nasip (2) * | 45.7905337201412,15.9877194091573 | 1.099/0.410 |
| 50 | Trnjanski nasip - uz Savu | 45.7894111411263,15.9876947623034 | 0.177 |
| 51 | Trnjanski nasip (3) | 45.7897506796707,15.9878386872978 | 0.175 |
| 52 | Petlja na Slavonskoj aveniji | 45.7949043519747,15.9985295899873 | 0.310 |
| 53 | NK Croatia Savica -uz Savu (1) | 45.7869301745477,15.9987511612843 | 0.137 |
| 54 | NK Croatia Savica -uz Savu (2) | 45.7873074549235,15.9988529488188 | 0.215 |
| 55 | NK Croatia Savica -uz Savu (3) | 45.7879704748768,15.9986244868195 | 0.448 |
| 56 | Džamija Borovje | 45.7909066922319,16.010126155733 | 0.421 |
| 57 | Bauhaus Žitnjak - spremište Čistoće | 45.795090534933,16.0522047747407 | 0.223 |
| 58 | Janaf Terminal Žitnjak * | 45.7963635020115,16.0668635105983 | 0.542/0.437 |
| 59 | Pročišćivač otpadnih voda | 45.7944971923019,16.0792669788523 | 0.183 |
| 60 | Ivanjorečka cesta | 45.7997428089496,16.1080182735642 | 0.082 |
| 61 | Autocesta petlja Hrušćica * | 45.7923624810942,16.1289417187834 | 0.125/0.107 |
| 62 | Sesvete - ulica Blage Zadre | 45.8266542930915,16.1264660690146 | 0.141 |
| 63 | Sesvete - livada pored škole | 45.8333274377861,16.1047794554278 | 0.202 |
| 64A | Mikuševa ulica - Dubec, 0-2 cm * | 45.8290197790321,16.0846014842222 | 0.054/0.052 |
| 64B | Mikuševa ulica - Dubec, 2-4 cm * | 45.8290197790321,16.0846014842222 | 0.054/0.054 |
| 65 | Grad Mladih | 45.8502332704355,16.0486783087879 | 0.240 |
| 66 | Markuševec | 45.8796577000474,16.0224982866012 | 0.357 |
| 67 | Jaruga Rebar Kozjak (1) * | 45.8309304456805,16.0019013715374 | 0.505/0.349 |
| 68 | Jaruga Rebar Kozjak (2) | 45.8311316923503,16.0019578417402 | 0.381 |
| 69 | Barutana Ambulanta | 45.830298022013,16.0003100063588 | 0.704 |
| 70 | Radićevo šetalište | 45.8299267617057,15.9789251453309 | 0.452 |
| 71 | Mihaljevac (Šuma) | 45.8410611257105,15.9762674617809 | 0.314 |
| 72 | Mihaljevac (Livada) | 45.8409545836944,15.9758714311076 | 0.171 |
| 73 | Bliznec | 45.8692829898902,15.9788763017586 | 0.362 |
| 74 | Adolfovac | 45.8817654556618,15.971492964021 | 0.679 |
| 75 | Činovnička livada - donji dio - šuma * | 45.899776961168,15.9542611013382 | 1.848/1.343 |
| 76 | Činovnička livada - dno (2) * | 45.9003829526604,15.9536296894939 | 1.890/0.387 |
| 77 | Hunjka - Sjeverna padina | 45.91287765, 15.97204607 | 0.201 |
| 78 | Sljeme - vrh (šuma) | 45.8996025441563,15.9489672898962 | 1.873 |
| 79 | Sljeme Vrh - livada * | 45.8995911580052,15.9475478174519 | 3.027/2.423 |
| 80 | Crkva Sv. Jakov * | 45.8827660820915,15.9320763181073 | 0.489/0.341 |
| 81 | Medvedgrad | 45.8749433988795,15.9397800238047 | 0.247 |
| 82 | Šestine | 45.8571843417814,15.9486809780265 | 0.151 |
| 83 | Groblje Gornje Vrapče | 45.8266002015263,15.9073627455591 | 0.089 |
| 84 | Livada Gorenci | 45.84026938, 15.91193877 | 0.095 |
| 85 | Šalata Livada | 45.8172538901291,15.9835428187165 | 0.108 |
| 86 | Ribnjak | 45.8159532277393,15.9807901895536 | 0.260 |
| 87 | Ribnjak (2) | 45.815320650954,15.9815977932001 | 0.286 |
| 88 | Javni Wc - livada | 45.8133675983546,15.9788184221939 | 0.372 |
| 89 | Zrinjevac | 45.8108508502514,15.9783604621421 | 0.472 |
| 90 | Zrinjevac (2) | 45.8097653623494,15.9781230138765 | 0.469 |
| 91 | Strossmayerov Trg * | 45.8084638970296,15.9781433068071 | 0.729/0,409 |
| 92 | Tomislavac | 45.8068231503416,15.9783594968143 | 0.239 |
| 93 | Cmrok Livada (1) | 45.8357858085536,15.9720231989523 | 0.304 |
| 94 | Cmrok Šuma | 45.8355394958674,15.9709901723723 | 0.319 |
| 95 | Cmrok Livada (2) | 45.8358960003264,15.9730086646345 | 0.352 |
| 96 | Tuškanac - šuma | 45.8244339310412,15.9690668982057 | 0.281 |
| 97 | Tuškanac - livada * | 45.8245872401338,15.969796949185 | 0.220/0.202 |
| 98 | Trg Dr. Franje Tuđmana | 45.8105932741351,15.9555789537231 | 0.233 |
| 99 | Park Pravednika među narodima - jaruga * | 45.806420820498,15.9445828324816 | 0.878/0.883 |
| 100 | Park Pravednika - višlje od jaruge | 45.8068482552254,15.9442174534753 | 0.782 |
| 101 | Poglavarstvo grada Zagreba | 45.8007451874247,15.9764039623233 | 0.378 |
| 102 | Poglavarstvo grada Zagreba (2) * | 45.8006493678313,15.9757123995982 | 0.750/0.307 |
| 103 | Trnjanski nasip - most Slobode Sjeverna strana | 45.7908131003426,15.9821906196011 | 0.170 |
| 104 | Šire područje oko Ustave Kunišćak * | 45.7904523086803,15.9872517164222 | 0.232/0.149 |
| 105 | Maksimir (1) oko crkve Sv. Jurja | 45.8247877135216,16.02510956668 | 0.140 |
| 106 | Maksimir (2) Bukovačka - zapad | 45.8226922910388,16.0136379971368 | 0.476 |
| 107 | Potok u Maksimiru blizu Bukovačke * | 45.8227843572939,16.0138624328225 | 0.727/0.319 |
| 108 | Barutana - jaruga spoj | 45.8307385076353,16.0050223679232 | 0.272 |
| 109 | Barutana - Križanje Tučanove i Salopekove ulice | 45.8295679372952,16.0042876216259 | 0.281 |
| 110 | Jakuševec Zapad 1 | 45.7639685124364,16.0201527031963 | 0.275 |
| 111 | Jakuševec Zapad 2 | 45.7640265632125,16.0185065326186 | 0.085 |
| 112 | Jakuševec Sredina 1 | 45.7618346258767,16.0231848000554 | 0.152 |
| 113 | Jakuševec Sredina 2 * | 45.7624959067962,16.023948068522 | 0.180/0.112 |
| 114 | Jakuševec Istok 1 | 45.7552667080561,16.0301438022254 | 0.227 |
| 115 | Jakuševec Istok 2 * | 45.7594193882746,16.039880584166 | 0.223/0.321 |
| 116 | Petina - kraj aerodroma | 45.7543014786061,16.086694405318 | 0.066 |
| 117 | Zelena Magistrala | 45.8374880265475,15.8829942804282 | 0.158 |
| 118 | Zelena Magistrala 2 | 45.8252727590539,15.8732968793435 | 0.225 |
| 119 | Gajnice Park | 45.8161784451918,15.8739764208085 | 0.300 |
| 120 | Vrapče - blizu bolnice | 45.8127733323109,15.8973861147384 | 0.470 |
| 121 | Grubišnopoljski put - Rudeš * | 45.7989998655385,15.9158978041369 | 0.507/0.248 |
| 122 | Savica | 45.7820387895255,16.0219886767542 | 0.321 |
| 123 | Borongaj cesta-šuma * | 45.8077755773537,16.0300792820734 | 0.639/0.483 |
| 124a | Novi Jelkovec, 0-2 cm * | 45.8119603937189,16.0858977873957 | 0.089/0.066 |
| 124b | Novi Jelkovec, 15-25 cm * | 45.8119603937189,16.0858977873957 | 0.089/0.074 |
| 125 | Gornja Dubrava | 45.8326561893296,16.044362686839 | 0.277 |
