# Supplementary material for: Magnetic and Geochemical Properties of Zagreb City Area Soils
Source: Preprints.org preprint supplement (doi:10.20944/preprints202309.0107.v1), 2023-09-04
Supplement: Supplementary file 3 [file TABLE 5A.docx]

**Table 5A.** In-situ measurements – Members of Cluster Number 1 and distances from respective cluster center. Cluster contains 25 cases.

| Locality | Distance |
| --- | --- |
| Bundek - istok | 0.028480 |
| Bundek - sredina | 0.010520 |
| Studentski dom SR | 0.151480 |
| Studentski dom SR - preko nasipa | 0.081480 |
| Prisavlje - uz Savu (2) | 0.681520 |
| Prisavlje (3) | 0.116480 |
| Trnjanski nasip (2) | 0.460520 |
| NK Croatia Savica -uz Savu (3) | 0.190480 |
| Janaf Terminal Žitnjak | 0.096480 |
| Jaruga Rebar Kozjak (1) | 0.133480 |
| Barutana Ambulanta | 0.065520 |
| Radićevo šetalište | 0.186480 |
| Adolfovac | 0.040520 |
| Crkva Sv. Jakov | 0.149480 |
| Zrinjevac | 0.166480 |
| Zrinjevac (2) | 0.169480 |
| Strossmayerov Trg | 0.090520 |
| Park Pravednika među narodima - jaruga | 0.239520 |
| Park Pravednika - višlje od jaruge | 0.143520 |
| Poglavarstvo grada Zagreba (2) | 0.111520 |
| Maksimir (2) Bukovačka - zapad | 0.162480 |
| Potok u Maksimiru blizu Bukovačke | 0.088520 |
| Vrapče - blizu bolnice | 0.168480 |
| Grubišnopoljski put - Rudeš | 0.131480 |
| Borongaj | 0.000520 |
