# Supplementary material for: Magnetic and Geochemical Properties of Zagreb City Area Soils
Source: Preprints.org preprint supplement (doi:10.20944/preprints202309.0107.v1), 2023-09-04
Supplement: Supplementary file 4 [file TABLE 6A.docx]

**Table 6A**. In-situ measurements – Members of Cluster Number 2 and distances from respective cluster center. Cluster contains 5 cases.

| **Locality** | **Distance** |
| --- | --- |
| Prisavlje - uz Savu (1) | 0.191600 |
| Činovnička livada - donji dio | 0.263600 |
| Činovnička livada - dno (2) | 0.221600 |
| Sljeme - vrh (šuma) | 0.238600 |
| Sljeme vrh - livada | 0.915400 |
