# Supplementary material for: Magnetic and Geochemical Properties of Zagreb City Area Soils
Source: Preprints.org preprint supplement (doi:10.20944/preprints202309.0107.v1), 2023-09-04
Supplement: Supplementary file 5 [file TABLE 7A.docx]

**Table 7A.** In-situ MS measurements – Members of Cluster Number 3 and distances from respective cluster center. Cluster contains 95 cases.

| **Locality** | **Distance** |
| --- | --- |
| Domovinski most Žitnjak | 0.078526 |
| Domovinski most - Desna obala | 0.059526 |
| Sajmišna cesta - istočno od željezničkog mosta | 0.040526 |
| Jakuševec - uz ogradu | 0.080526 |
| Jakuševec - uz ogradu preko nasipa | 0.049474 |
| Jakuševec - zapadna strana | 0.077526 |
| Jakuševec - zapadna strana preko nasipa | 0.190474 |
| Most Mladosti južna strana | 0.088526 |
| Bundek - zapad | 0.042526 |
| Dugave - kod Mamutice | 0.067526 |
| Mala Mlaka - uz vodocrpilište (1) | 0.052474 |
| Mala Mlaka - uz vodocrpilište (2) | 0.062474 |
| Bauhaus Buzin | 0.069526 |
| Park Mladenaca | 0.032474 |
| Park Mladenaca - igralište | 0.082526 |
| Radmanovačka ulica | 0.053526 |
| Jadranski most - jug | 0.037474 |
| Park kod bolnice Blato | 0.058526 |
| Lučko - ispod mosta | 0.180474 |
| Jankomirski most | 0.101526 |
| Podsused most - lijeva obala | 0.085474 |
| Dom zdravlja Špansko | 0.058526 |
| Prisavlje - između Kockice i nebodera | 0.150474 |
| Klub Jedrenja (1) | 0.084526 |
| Klub Jedrenja (2) | 0.090526 |
| Bejzbol Klub Jarun Uz Savu (1) | 0.028526 |
| Bejzbol Klub Jarun Uz Savu (2) | 0.047526 |
| Bejzbol Klub Jarun Uz Savu (3) | 0.077526 |
| Beach Bar Jarun | 0.058526 |
| Kanu Klub Končar (1) | 0.099526 |
| Kanu Klub Končar (2) livada | 0.021526 |
| Sava uz Malo jezero (1) | 0.046526 |
| Sava uz Malo jezero (2) | 0.088526 |
| Sava uz Malo jezero (3) | 0.039526 |
| Aquarius klub | 0.024526 |
| Potok Črnomerec (1) | 0.003474 |
| Potok Črnomerec (2) | 0.132474 |
| Šuma uz potok Črnomerec | 0.035474 |
| Beach Champ bar Jarun | 0.027526 |
| IRB | 0.023474 |
| Trnjanski nasip (1) | 0.056474 |
| Trnjanski nasip - uz Savu | 0.035526 |
| Trnjanski nasip (3) | 0.037526 |
| Petlja na Slavonskoj aveniji | 0.097474 |
| NK Croatia Savica -uz Savu (1) | 0.075526 |
| NK Croatia Savica -uz Savu (2) | 0.002474 |
| Džamija Borovje | 0.208474 |
| Bauhaus Žitnjak - spremište Čistoće | 0.010474 |
| Pročišćivač otpadnih voda | 0.029526 |
| Ivanjorečka cesta | 0.130526 |
| Autocesta petlja Hrušćica | 0.087526 |
| Sesvete - ulica Blage Zadre | 0.071526 |
| Sesvete - livada pored škole | 0.010526 |
| Mikuševa ulica - Dubec | 0.158526 |
| Grad Mladih | 0.027474 |
| Markuševec | 0.144474 |
| Jaruga Rebar Kozjak (2) | 0.168474 |
| Mihaljevac (Šuma) | 0.101474 |
| Mihaljevac (Livada) | 0.041526 |
| Bliznec | 0.149474 |
| Hunjka - Sjeverna padina | 0.011526 |
| Medvedgrad | 0.034474 |
| Šestine | 0.061526 |
| Groblje Gornje Vrapče | 0.123526 |
| Livada Gorenci | 0.117526 |
| Šalata Livada | 0.104526 |
| Ribnjak | 0.047474 |
| Ribnjak (2) | 0.073474 |
| Javni Wc - livada | 0.159474 |
| Tomislavac | 0.026474 |
| Cmrok Livada (1) | 0.091474 |
| Cmrok Šuma | 0.106474 |
| Cmrok Livada (2) | 0.139474 |
| Tuškanac - šuma | 0.068474 |
| Tuškanac - livada | 0.007474 |
| Trg Dr. Franje Tuđmana | 0.020474 |
| Poglavarstvo grada Zagreba | 0.165474 |
| Trnjanski nasip - most Slobode Sjev. | 0.042526 |
| Šire područje oko Ustave Kunišćak | 0.019474 |
| Maksimir (1) oko crkve Sv. Jurja | 0.072526 |
| Barutana - jaruga spoj | 0.059474 |
| Barutana - Križanje Tučanove i Salopekove | 0.068474 |
| Jakuševec Zapad 1 | 0.062474 |
| Jakuševec Zapad 2 | 0.127526 |
| Jakuševec Sredina 1 | 0.060526 |
| Jakuševec Sredina 2 | 0.032526 |
| Jakuševec Istok 1 | 0.014474 |
| Jakuševec Istok 2 | 0.010474 |
| Petina - kraj aerodroma | 0.146526 |
| Zelena Magistrala | 0.054526 |
| Zelena Magistrala 2 | 0.012474 |
| Gajnice Park | 0.087474 |
| Savica | 0.108474 |
| Gornja Dubrava | 0.064474 |
| Novi Jelkovec | 0.123526 |
